# Supplementary material for: Update on Avian Influenza A (H5N1) Virus Infection in Humans
Source: Atypon-hosted journal article supplement (doi:10.1056/nejmra0707279), 2008-01-16
Supplement: nejm_hayden_261sa1.pdf [file nejm_hayden_261sa1.pdf]

## Supplementary Appendix

This appendix has been provided by the authors to give readers additional information about their work.

Supplement to: Writing Committee of the Second World Health Organization Consultation on Clinical Aspects of Human Infection with Avian Influenza A (H5N1) Virus. Update on avian influenza A (H5N1) virus infection in humans. *N Engl J Med* 2008;358:261-73.

Revised 17 December 2007

**Supplementary Materials: Update on Avian Influenza A (H5N1) Virus Infection in Humans**

Writing Committee of the Second World Health Organization (WHO) Consultation on Clinical Aspects of Human Infection with Avian Influenza A(H5N1) Virus

Correspondence: Frederick G. Hayden, M.D.

Global Influenza Programme (GIP), Department of Epidemic & Pandemic Alert & Response (EPR), World Health Organization

20 Avenue Appia, 1211 Geneva 27, Switzerland

Tel: +41 22 791 2765; Fax: +41 22 791 4878; e-mail : [HaydenF@who.int](mailto:HaydenF@who.int)

# Update on Avian Influenza A (H5N1) Virus Infections in Humans

## Supplementary Figures 1 and 2

The total number of laboratory confirmed influenza A(H5N1) virus-infected persons reported to WHO by month from December, 2003 to September, 2007. Cases in several countries with larger numbers of affected persons are indicated separately. Cases have occurred year-round but increased numbers have been seen during December - May in temporal association with increased outbreaks in poultry(1).

See the WHO web site for updated information:

[http://www.who.int/csr/disease/avian\\_influenza/country/en/index.html](http://www.who.int/csr/disease/avian_influenza/country/en/index.html)

**Number of Confirmed Human H5N1 Cases  
by month of onset as of 2007-08-24**

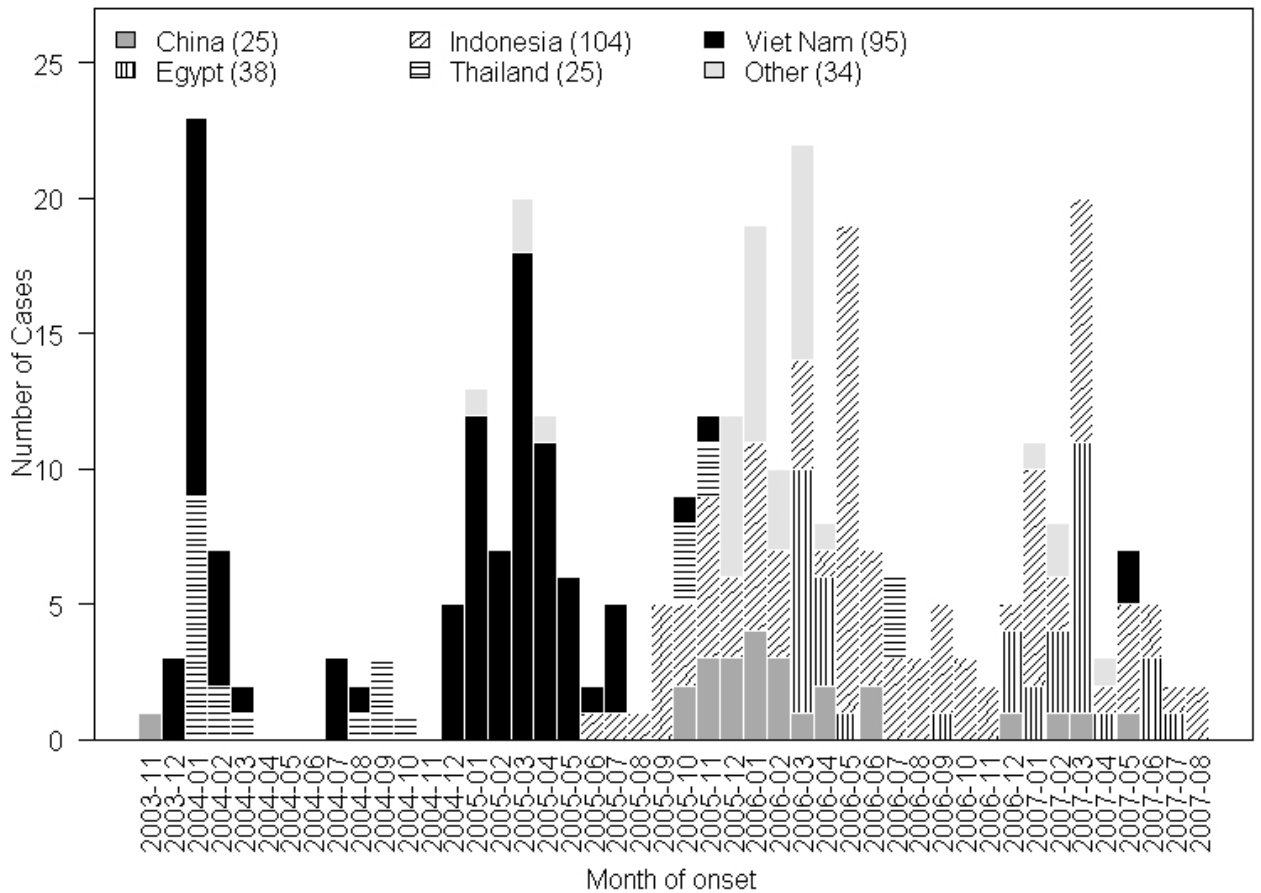

## Clinical management algorithm (in areas with H5N1 virus infection)<sup>1</sup>

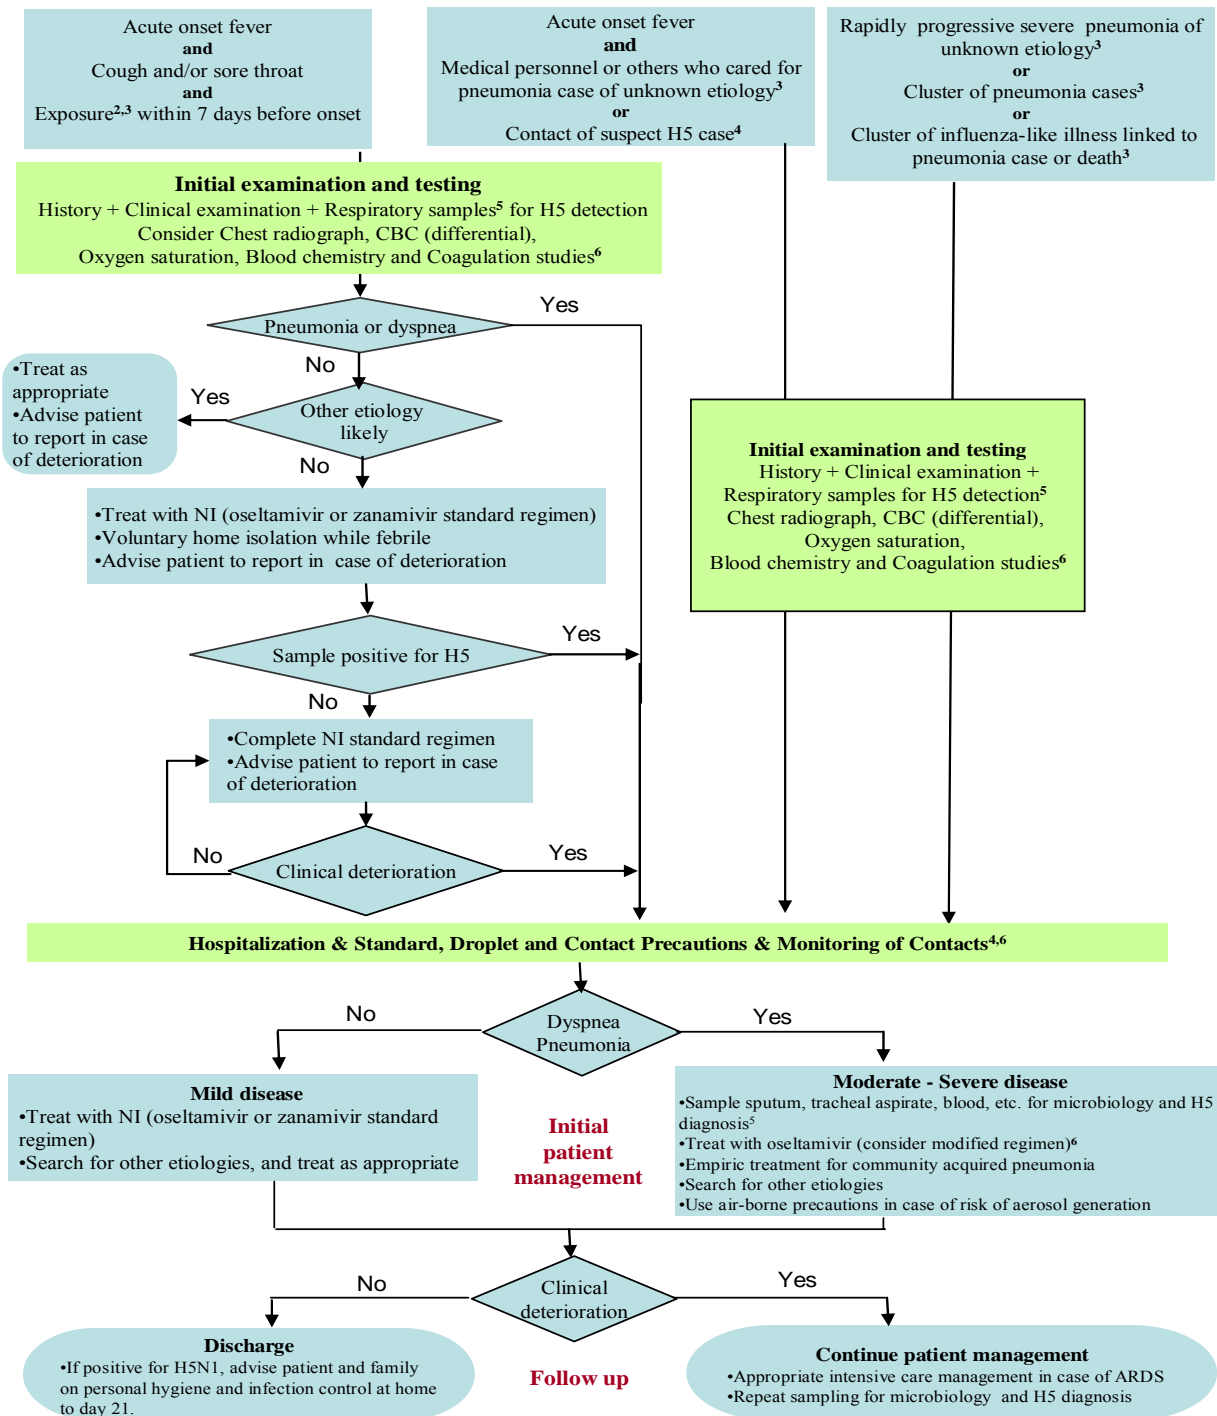

## Notes to Figure 2:

1. This suggested evaluation and management algorithm applies to areas with A(H5N1) virus infection in poultry, other animals, or humans during the current pandemic alert period. It should be considered as general basic guidance and adapted according to local circumstances and new information.
2. Exposure history to animals (chickens, other poultry, or other animals ) or their environment includes the following:
  - Handled, played with, de-feathered, slaughtered, butchered, prepared, cleaned cages, shared living space, handled/used dropping as fertilizers,
  - Visited live bird /wet market,
  - Hunting, contact with wild birds,
  - Occupational exposure to animals and /or animal products (slaughterer, farm worker, factory worker, poultry seller, veterinarian, culler, laboratory worker),
  - Consumption of raw or undercooked poultry products (e.g. meat, eggs, blood, liver).

Exposure to a confirmed, probable, or suspected A(H5N1) patient. Recommend empiric NI treatment pending confirmation of an alternative diagnosis. Note that initial manifestations of H5N1 illness may be nonspecific or atypical (e.g. fever with or without diarrhoea).

See WHO web site for details of case investigation:

*WHO guidelines for investigation of human cases of avian influenza A(H5N1)*

[http://www.who.int/csr/resources/publications/influenza/WHO\\_CDS\\_EPR\\_GIP\\_2006\\_4/en/index.html](http://www.who.int/csr/resources/publications/influenza/WHO_CDS_EPR_GIP_2006_4/en/index.html)

3. For those presenting with illness in non-A(H5N1)-affected areas, consider travel history to an outbreak area or contact with an ill traveller returning from an A(H5N1)-affected area within 7 days before onset of illness, as well as the exposures to sick or dead birds.
4. Anyone who is contact of a confirmed, probable, or, depending on public health resources, suspect case should be actively monitored for illness for a minimum of 7 days after the last exposure.

See WHO guidelines for NI post-exposure prophylaxis:

*WHO Rapid Advice Guidelines on pharmacological management of humans infected with avian influenza A (H5N1) virus*

[http://www.who.int/csr/disease/avian\\_influenza/guidelines/pharmamanagement/en/index.html](http://www.who.int/csr/disease/avian_influenza/guidelines/pharmamanagement/en/index.html)

5. Viral RNA detection is method of choice for initial diagnosis. Collect nose and throat swabs and, if available, tracheal secretions for detection of H5 and influenza A RNA by nucleic acid amplification testing (reverse transcriptase-polymerase chain reaction). Throat swabs are currently the highest yield upper respiratory tract specimen for detecting A(H5N1) virus. Nasal swabs with nasal secretions or nasopharyngeal aspirates or swabs are appropriate specimens for detecting human influenza A and B and therefore useful if the influenza is not due to A(H5N1). Collection of multiple specimens over several days may increase diagnostic yield. **Use appropriate precautions when collecting clinical specimens.**

See WHO web site for details of sampling:

*Collecting, preserving and shipping specimens for the diagnosis of avian influenza A(H5N1) virus infection. Guide for field operations*

[http://www.who.int/csr/resources/publications/surveillance/WHO\\_CDS\\_EPR\\_ARO\\_2006\\_1/en/](http://www.who.int/csr/resources/publications/surveillance/WHO_CDS_EPR_ARO_2006_1/en/)

6. Pending the results of H5N1 diagnostic testing and depending on available resources, voluntary home isolation while on empiric antiviral therapy may be a reasonable alternative for contacts with mild illness.

See WHO web site for updated advice regarding A(H5N1) case management:

*Clinical management of human infection with avian influenza A(H5N1) virus*

[http://www.who.int/csr/disease/avian\\_influenza/guidelines/clinicalmanage07/en/index.html](http://www.who.int/csr/disease/avian_influenza/guidelines/clinicalmanage07/en/index.html)

See WHO web site for guidance regarding infection control:

*Infection prevention and control of epidemic- and pandemic-prone acute respiratory diseases in health care*

[http://www.who.int/csr/resources/publications/WHO\\_CD\\_EPR\\_2007\\_6/en/index.html](http://www.who.int/csr/resources/publications/WHO_CD_EPR_2007_6/en/index.html)

Abbreviations: NI, neuraminidase inhibitors

**Supplementary Table 1. Frequencies of A(H5N1) infection in various risk populations, 2004-7.**

| <b>Location<br/>(Reference)</b> | <b>Years</b> | <b>Groups</b>                                                                         | <b>Sampling<br/>methods</b>     | <b>No. sampled<br/>for A(H5N1)</b> | <b>No. (%)<br/>positive for<br/>A(H5N1)</b> | <b>Comment</b>                                             |
|---------------------------------|--------------|---------------------------------------------------------------------------------------|---------------------------------|------------------------------------|---------------------------------------------|------------------------------------------------------------|
| Cambodia (2)                    | 2005         | Villagers $\leq$ 1 km of fatal human A(H5N1) infection in area with poultry outbreaks | Serology (MN, WB)               | 351                                | 0                                           | High frequency of direct poultry contact in cohort.        |
| Cambodia(3)                     | 2005-6       | Close contacts (relatives, HCWs, villagers) of A(H5N1) patients                       | Clinical, RT-PCR, serology (MN) | 80                                 | 0                                           |                                                            |
| China (4)                       | 2005         | Close contacts of 2 cases                                                             | Clinical                        | 191                                | NA                                          | No illnesses during 10 days of observation.                |
| Thailand (5)                    | 2004         | Healthcare workers with exposure to H5N1 patient                                      | Clinical, serology (MN, WB)     | 25                                 | 0                                           | Exposed HCWs had unprotected contact for 2 days with case. |
|                                 |              | Healthcare workers with no known exposure contact                                     |                                 | 24                                 | 0                                           |                                                            |

|              |        |                                                                             |                                                 |     |          |                                                                                                                                                                                    |
|--------------|--------|-----------------------------------------------------------------------------|-------------------------------------------------|-----|----------|------------------------------------------------------------------------------------------------------------------------------------------------------------------------------------|
| China (6)    | 2006   | Wet poultry market workers                                                  | Serology (MN)                                   | 110 | 1 (0.1%) |                                                                                                                                                                                    |
| Thailand (7) | 2005-6 | Adults with CAP admitted to ICU                                             | TA for RT-PCR, virus culture; serology (MN, IF) | 115 | 0        | 18 (16%) met Thai clinical-epidemiologic criteria for probable A(H5N1) disease. Respiratory pathogen found in 58%, including 8 (7%) with influenza A(H3N2)                         |
| Nigeria(8)   | 2006   | Poultry market workers                                                      | Serology (MN)                                   | 295 | 0        | Exposed poultry workers had a median of 14 days to suspected or confirmed A(H5N1)-infected poultry                                                                                 |
| Multiple (9) | 2003-6 | ARD in returning US travelers from A(H5N1) affected areas or their contacts | RT-PCR, serology (MN)                           | 41  | 0        | 25/59 (42%), including 2 of 4 who died, were positive for influenza A(H3N2). 27/59 (46%) patients met CDC criteria for suspected A(H5N1) case, but none had direct poultry contact |

**Abbreviations:** MN, microneutralization; WB, Western blot; HAI, hemagglutination-inhibition; CAP, community-acquired pneumonia; TA, tracheal aspirate; RT-PCR, reverse-transcriptase- polymerase chain reaction; HCW, health care workers; ILI, influenza-like illness; ARD, acute respiratory disease

**Supplementary Table 2. Sensitivity of commercial rapid antigen testing in human A(H5N1) infections.** Diagnostic yield depends heavily on the quality and type of specimen, conditions of sample transport and storage, and duration of illness.

| <b>Location (Reference)</b>                              | <b>Specimen type</b>     | <b>No. patients tested</b> | <b>Sensitivity</b> | <b>Comment</b>                                                                                                       |
|----------------------------------------------------------|--------------------------|----------------------------|--------------------|----------------------------------------------------------------------------------------------------------------------|
| Hong Kong, 1997 (10)                                     | Nasopharyngeal aspirates | 7                          | 86 %               | The relatively high sensitivity of antigen testing in nasopharyngeal aspirates is notable but requires confirmation. |
| Thailand [T Chotpitayasunondh, unpublished observations] | Nasopharyngeal swabs     | 18                         | 28 %               |                                                                                                                      |
| Vietnam [M de Jong, unpublished observations]            | Throat swabs             | 14                         | 21 %               |                                                                                                                      |
| Turkey (11)                                              | Nasopharyngeal swabs     | 8                          | 0 %                |                                                                                                                      |
| Indonesia (12)                                           | Nose, throat swabs       | 8                          | 0 %                |                                                                                                                      |
| <b>Total since 2004</b>                                  | Respiratory              | 48                         | 17 %               |                                                                                                                      |

**Supplementary Table 3. Representative antiviral agents of clinical investigative interest with activity against A/H5N1 viruses in animal models.**

| <b>Agent (Reference)</b> | <b>Target</b>            | <b>Route of administration</b> | <b>Activity in animal model of A/H5N1 (type)</b> | <b>Status of human testing</b>                       | <b>Comment</b>                                                   |
|--------------------------|--------------------------|--------------------------------|--------------------------------------------------|------------------------------------------------------|------------------------------------------------------------------|
| Peramivir(13-15)         | Neuraminidase            | IV, IM                         | Yes (mouse, ferret)                              | Phase 2 in seasonal influenza                        | Prolonged human plasma T1/2elim                                  |
| Zanamivir(16;17)         | Neuraminidase            | IV                             | Yes (macaque)                                    | Phase 2a                                             | Highly active and well-tolerated in experimental human influenza |
| T-705(18)                | RNA polymerase           | PO                             | Yes (mouse)                                      | Phase 1                                              | Phase 2 in seasonal influenza anticipated this season            |
| DAS181(19;20)            | HA receptor              | Topical                        | Yes (ferret)                                     | Phase 1 (pending)                                    |                                                                  |
| Antibody(21-24)          | HA, other virus proteins | IV                             | Yes (mouse)                                      | Convalescent plasma used in several A/H5N1 patients. | Several murine and human monoclonals active in animals.          |

|               |                |        |             |                                  |                                                                                                                                     |
|---------------|----------------|--------|-------------|----------------------------------|-------------------------------------------------------------------------------------------------------------------------------------|
| Ribavirin(25) | RNA polymerase | PO, IV | Yes (mouse) | Used in several A(H5N1) patients | Combinations of oseltamivir and ribavirin show enhanced antiviral and survival benefits in murine models of A(H5N1) virus infection |
|---------------|----------------|--------|-------------|----------------------------------|-------------------------------------------------------------------------------------------------------------------------------------|

**Supplementary Table 4. Representative immunogenicity studies of candidate inactivated H5N1 vaccines with or without adjuvants**

| Source of report, year (Reference) | Target population                | Vaccine type                                                                                 | Route                  | Vaccine dose (ug of HA)                              | Seroconversion ( $\geq$ 4-fold increase) or responses to specific titer for vaccine virus (percent of subjects) | GMT titer change (fold change vs baseline) | Comment                                                                                                                                               |
|------------------------------------|----------------------------------|----------------------------------------------------------------------------------------------|------------------------|------------------------------------------------------|-----------------------------------------------------------------------------------------------------------------|--------------------------------------------|-------------------------------------------------------------------------------------------------------------------------------------------------------|
| Treanor, 2001 (26)                 | Healthy adults (N=146)           | Recombinant HA, insect cells, non-adjuvanted H5 from A/HongKong/156/97 and A/HongKong/483/97 | IM X 2 (Days 0, 21-42) | 0<br>25<br>40<br>90 + 10<br>90                       | MN $\geq$ 1:80<br>4%<br>17%<br>28%<br>33%<br>52%                                                                |                                            | Dose-related antibody responses to recombinant H5 antigen. Highest dose group (90 ug) showed an increase in MN titer after 1 dose in 17% of subjects. |
| Nicholson, 2001 (27)               | Healthy adults, 18-40 yrs (N=65) | Surface antigen, egg-grown, with or without MF-59 A/duck/Singapore/97 (H5N3)                 | IM X 2 (days 0, 21)    | 7.5 / 7.5 + MF59<br>15 / 15 + MF59<br>30 / 30 + MF59 | MN<br>10%/80%<br>18%/100%<br>36%/100%                                                                           | SRH<br>1.0/23<br>3.1/19<br>2.4/18          | Frequency of MN seroconversion to clade 0 A/Hong Kong/156/97 was 9% without adjuvant and 93% with MF-59. Low frequency of seroconversions to clade 1  |

|                    |                                            |                                                                                |                     |                            |                                      |                                                 |                                        |                                                                                                        |
|--------------------|--------------------------------------------|--------------------------------------------------------------------------------|---------------------|----------------------------|--------------------------------------|-------------------------------------------------|----------------------------------------|--------------------------------------------------------------------------------------------------------|
|                    |                                            |                                                                                |                     |                            |                                      |                                                 |                                        | viruses (0-14%) after 2 doses. (28)                                                                    |
| Treanor, 2006 (29) | Healthy adults, 18-64 yrs (N=451)          | Split virus (rg), egg-grown, formalin-inactivated, non-adjuvanted A/VN/1203/04 | IM X 2 (Days 0, 21) | 0<br>7.5<br>15<br>45<br>90 | HAI<br>0<br>13%<br>24%<br>41%<br>57% | MN $\geq$ 1:20<br>0<br>25%<br>32%<br>57%<br>70% | HAI<br>1.0<br>1.3<br>2.0<br>3.2<br>5.4 | Dose-related antibody responses. Boosting of antibody responses with 3 <sup>rd</sup> dose at 6 months. |
| Treanor, 2007*     | Elderly, healthy adults, 65-87 yrs (N=259) | Split virus (rg), egg-grown, formalin-inactivated, non-adjuvanted A/VN/1203/04 | IM X 2 (Days 0, 28) | 0<br>45<br>90              | MN<br>2%<br>21%<br>35%               | HAI $\geq$ 1:40<br>4%<br>35%<br>46%             | HAI<br>6.7<br>16.7<br>26.2             | Antibody responses generally comparable to those in younger adults.                                    |

|                         |                                   |                                                                                                                                |                     |                                                                                     |                                                                    |                                                                     |                                                             |                                                                                                                                                                                     |
|-------------------------|-----------------------------------|--------------------------------------------------------------------------------------------------------------------------------|---------------------|-------------------------------------------------------------------------------------|--------------------------------------------------------------------|---------------------------------------------------------------------|-------------------------------------------------------------|-------------------------------------------------------------------------------------------------------------------------------------------------------------------------------------|
| Bernstein, 2007*        | Healthy adults, 18-64 yrs (N=378) | Split virus (rg), egg-grown, formalin-inactivated, non-adjuvanted or with alum (AL(OH) <sub>3</sub> ) or MF-59<br>A/VN/1203/04 | IM X 2 (Days 0, 28) | 0<br>7.5 + alum<br>7.5 + MF59<br>15/ 15 + alum<br>15 + MF-59<br>30/ 30 + alum<br>45 | HAI ≥ 1:40<br>0%<br>3%<br>23%<br>24%/ 7%<br>63%<br>18%/ 14%<br>24% | MN ≥ 1:40<br>4%<br>14%<br>37%<br>26%/ 18%<br>81%<br>28%/ 24%<br>48% |                                                             | Benefit from addition of MF-59 but not alum adjuvant. Two doses of 15 ug + MF-59 induced MN ≥ 1:40 in 81% of subjects. Antibody titers decreased significantly by 6 months.         |
| Leroux-Roels, 2007 (30) | Healthy adults, 18-60 yrs (N=394) | Split virus (rg), egg-grown, inactivated, with or without AS03 adjuvant,<br>A/VN/1194/04(NIBRG-14)                             | IM X (Days 0, 21)   | 3.8 / 3.8 +ASO3<br>7.5 / 7.5 +ASO3<br>15 / 15 +ASO3<br>30 / 30 +ASO3                | HAI<br>4% / 82%<br>16% / 90%<br>35% / 96%<br>41% / 85%             | MN<br>22% / 86%<br>37% / 86%<br>53% / 86%<br>65% / 98%              | HAI<br>1.2 / 27.9<br>1.7 / 38.1<br>2.8 / 60.5<br>3.9 / 36.4 | All CHMP criteria met by 2 doses of 3.8ug + ASO3 but by none of non-adjuvanted doses. Cross-reactive responses to clade 2.1 virus in 77% at 3.8 ug dose of AS03-adjuvanted vaccine. |

|                    |                                   |                                                                                                                       |                                  |                                                                                      |                                                                                    |                                                      |                                                                                                                                                                                                        |
|--------------------|-----------------------------------|-----------------------------------------------------------------------------------------------------------------------|----------------------------------|--------------------------------------------------------------------------------------|------------------------------------------------------------------------------------|------------------------------------------------------|--------------------------------------------------------------------------------------------------------------------------------------------------------------------------------------------------------|
| Keitel, 2007*      | Healthy adults, 18-49 yrs (N=570) | Split virus (rg), egg-grown, formalin-inactivated, with or without alum (Al(OH) <sub>3</sub> ) A/VN/1203/04           | IM X 2 (days 0, 28)              | 3.75/3.75 + alum<br>7.5 / 7.5 + alum<br>15 / 15 + alum<br>45 / 45 + alum             | HAI<br>4%/ 2%<br>0%/ 14%<br>13%/ 14%<br>25%/ 33%                                   | HAI<br>5.7/ 5/4<br>5.3/ 7.7<br>8.5/ 8.1<br>12.0/14.8 | No significant effect of adding alum, except at 7.5ug HA dose level.                                                                                                                                   |
| Bresson, 2006 (31) | Healthy adults, 18-40 yrs (N=300) | Split virus (rg), egg-grown, formalin-inactivated, with or without alum (Al(OH) <sub>3</sub> ) A/VN/1194/04(NIBRG-14) | IM X 2                           | 7.5 / 7.5 + alum<br>15 / 15 + alum<br>30 / 30 + alum                                 | HAI MN ≥ 1:20<br>43% / 28% 20% / 16%<br>44% / 44% 22% / 18%<br>52% / 67% 27% / 41% | HAI<br>4.9 / 2.6<br>4.5 / 4.3<br>6.7 / 11.6          | Effect of alum adjuvant evident only at 30 ug HA dose. Cross-reacting Nt antibody to clade 2.2 (32-39%) > 2.1 (4-5%) viruses with or without alum*.                                                    |
| Tashiro, 2007*     | Healthy adults, 20-39 yrs (N=120) | Whole virus (rg), egg-grown, formalin-inactivated, with alum A/VN/1194/04(NIBRG-14)                                   | IM X 2 (day 0, 21)<br><br>SC X 2 | 1.75 + alum<br>5.0 + alum<br>15 + alum<br><br>1.75 + alum<br>5.0 + alum<br>15 + alum | MN<br>43%<br>71%<br>96%<br><br>50%<br>72%<br>84%                                   | MN<br>3.1<br>7.2<br>10.6<br><br>3.3<br>5.6<br>10.4   | Single 15 ug dose induced seroconversion in 62%. Evidence for heterologous antibody reactivity to clade 2 viruses. SC route associated with higher local reactogenicity and no greater immunogenicity. |

|                |                                   |                                                                                                                                      |                     |                                                                          |                                                                   |                                                               |                                                                                                                                                  |
|----------------|-----------------------------------|--------------------------------------------------------------------------------------------------------------------------------------|---------------------|--------------------------------------------------------------------------|-------------------------------------------------------------------|---------------------------------------------------------------|--------------------------------------------------------------------------------------------------------------------------------------------------|
|                |                                   |                                                                                                                                      |                     |                                                                          |                                                                   |                                                               |                                                                                                                                                  |
| Hehme, 2007*   | Healthy adults, 18-60 yrs (N=371) | Whole virus (rg), egg-grown, with or without alum (Al(OH) <sub>3</sub> ) A/VN/1194/04(NIBRG-14)                                      | IM X 2 (days 0, 21) | 3.8 / 3.8 + alum<br>7.5 / 7.5 + alum<br>15 / 15 + alum<br>27 / 27 + alum | HAI<br>51% / 69%<br>57% / 62%<br>70% / 72%<br>72% / 92%           | HAI<br>5.7 / 12.2<br>7.9 / 10.2<br>10.7 / 14.3<br>14.7 / 30.5 | All 3 CHMP criteria met by 2 doses of 15ug + alum or of 27 ug without adjuvant                                                                   |
| Lin, 2006 (32) | Healthy adults, 18-60 yrs (N=120) | Whole virus (rg), egg-grown, formalin-inactivated, with alum A/VN/1194/04(NIBRG-14) (Sinovec)                                        | IM X 2 (Day 0, 28)  | 0<br>1.25 + alum<br>2.5 + alum<br>5.0 + alum<br>10 + alum                | HAI MN ≥ 1:20<br>0 4%<br>13% 48%<br>21% 50%<br>33% 96%<br>78% 96% | HAI<br>1.0<br>2.7<br>2.7<br>4.9<br>11.5                       | All 3 CHMP criteria met by 2 doses of 10ug + alum at day 42.                                                                                     |
| Kistner, 2007* | Healthy adults, 18-45 yrs (N=270) | Whole virus without genetic modification, Vero cells, formalin-inactivated, with or without alum (Al(OH) <sub>3</sub> ) A/VN/1203/04 | IM X 2 (days 0, 21) | 3.75 + alum<br>7.5 / 7.5 + alum<br>15 / 15 + alum<br>30 + alum           | Nt ≥ 1:20<br>NT/ 69%<br>76%/ 64%<br>71%/ 61%<br>NT/ 66%           | MN<br>NT / 4.4<br>5.3 / 4.0<br>5.7 / 3.9<br>NT / 4.6          | Higher antibody titers observed without alum. Cross-reactive MN titers ≥ 1:20 to A/Indonesia/05/2005 in 45% of non-adjuvanted 7.5 ug dose group. |

**Abbreviations:** rg, reverse genetics; HAI, hemagglutination-inhibition; MN, micro-neutralization; GMT, geometric mean titer

**Notes: Serology data are those reported at 3-4 weeks after second vaccine dose.**

\*Presented at 3<sup>rd</sup> WHO meeting on evaluation of pandemic influenza prototype vaccines in clinical trials, 15-16 February, WHO, Geneva. See WHO web site for details: [http://www.who.int/vaccine\\_research/diseases/influenza/meeting\\_150207/en/index.html](http://www.who.int/vaccine_research/diseases/influenza/meeting_150207/en/index.html)

CHMP criteria: The criteria for immunogenicity of seasonal influenza vaccines elaborated by the European Union Committee for Medicinal Products on the basis of HAI antibody assays and defined by ratio of GMT pre/post immunization > 2.5; seropositivity (HAI titer  $\geq$ 1:32) in >70% of subjects; and seroconversion (four-fold titer rise or significant increase from negative pre immunization) in >40% of subject

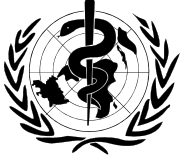

# **WORLD HEALTH ORGANIZATION**

---

**The Second WHO Consultation on Clinical Aspects of Human Infection with Avian Influenza A (H5N1) Virus Meeting, 19-21 March, 2007 Antalya Turkey**

## **Appendix 1- LIST OF PARTICIPANTS**

### **AZERBAIJAN**

Dr Fuad Mammadli, Republic Antiplague station  
Dr Faig Mammadzade, Republican Antiplague Station  
Dr Azim Naghdaliyev, Abulfaz Karayev Childrens' Hospital

### **CAMBODIA**

Dr Seng Heng, , Ministry of Health  
Dr Chour Nareth, Calmette Hospital

### **CHINA**

Professor Zhancheng Gao, Peking University People's Hospital  
Professor Zifen Gao, School of Basic Medical Sciences, Peking University  
Dr Jiang Gu, School of Basic Medical Science, Peking University  
Professor David Hui, The Chinese University of Hong Kong, The Prince of Wales Hospital  
Dr Zhipeng Li, Ministry of Health  
Dr Lijuan Niu, Anhui Provincial Health Bureau  
Professor Malik Peris, The University of Hong Kong, Queen Mary Hospital  
Dr Yuelong Shu, Virology Institute, China CDC  
Dr Ruiqian Xie, China CDC  
Dr Xiaoling Xu, Anhui Provincial Hospital

### **DJIBOUTI**

Dr Ammar Abdo Ahmed, Ministry of Health  
Dr Mohamed Maoulid Barkad, National Laboratory  
Dr Saleh Banoita Tourab, Ministry of Health

### **EGYPT**

Dr Abdel-Nasser Abdel-Ghaffar, Ministry of Health and Population  
Dr Hala Esmat, Public Health Central Laboratories  
Dr Mahmoud Abdel Meguid, Abbassia Chest Hospital  
Dr Zeinab Abdel Moneim Heddaya, Ministry of Health and Population

### **FRANCE**

Professor Jean-Daniel Chiche, Hôpital Cochin

### **INDONESIA**

Dr Patrick Blair, U.S. NAMRU-2  
Professor Hadiarto Mangunegoro, University of Indonesia, Persahabatan Hospital  
Dr T. Marwan Nusri, Ministry of Health  
Dr Krishna Nur Adriana Pangesti, NIHRD, Ministry of Health  
Professor Luhur Soeroso, RSUP Adam Malik Hospital  
Dr Santoso Soeroso, National Infectious Disease Hospital  
Dr Bambang Wahyu, RS Soetomo Hospital

#### **IRAQ**

Dr Sabah Mahdi Abd Al Aema, Ministry of Health  
Dr Farhad M. Ali, Ministry of Health  
Dr Omer Q. M. Ameen (Surchi), Hawller University

#### **JAPAN**

Professor Hitoshi Oshitani, Tohoku University Graduate School of Medicine

#### **NIGERIA**

Dr Kabir Az-Zubair, Asokoro Hospital  
Dr Egun Bamgboye, St Nicholas Hospital  
Dr E.B.A. Coker, Ministry of Health  
Dr A. Nasidi, Ministry of Health

#### **SWEDEN**

Dr Angus Nicoll, European Centre for Disease Prevention and Control (ECDC)

#### **THAILAND**

Dr Tawee Chotpitayasunondh, Queen Sirikit National Institute of Child Health  
Dr Rungrueng Kitphati, National Institute of Health  
Dr Sorasak Lochindarat, Queen Sirikit National Institute of Child Health  
Dr Woraya Luang-on, Ministry of Public Health  
Dr Chariya Sangsajja, Ministry of Public Health  
Dr Arunee Thititanyanont, Mahidol University  
Dr Kumnuan Ungchusak, Ministry of Public Health

#### **TURKEY**

Professor Selim Badur, Istanbul (Capa) University  
Dr Cihanser Erel, Ministry of Health  
Dr Hasan Irmak, Ministry of Health  
Professor Ahmet Faik Öner, Yuzuncuyil University Hospital  
Dr Mehmet Ali Torunoglu, Ministry of Health  
Professor Haluk Vahapoğlu, Kocaeli University  
Dr Neziha Yilmaz, Refik Saydam National Hygiene Centre

#### **UK**

Dr Julian Bion, University of Birmingham, Queen Elizabeth Hospital  
Dr Simon Mardel, Leicester Royal Infirmary

#### **USA**

Dr John Beigel, National Institutes of Health  
Dr Joseph Chiu, National Institutes of Health

Dr Elizabeth Higgs, National Institutes of Health  
Professor Arnold Monto, University of Michigan School of Public Health  
Dr Michael Polis, National Institutes of Health  
Dr Timothy Uyeki, Centers for Disease Control and Prevention  
Dr Herbert Wiedemann, Cleveland Clinic

#### **VIET NAM**

Professor Nguyen Duc Hien, National Institute for Infectious and Tropical Diseases  
Dr Peter Horby, Oxford University Clinical Research Unit  
Dr Pham Hung, Ministry of Health  
Dr Menno de Jong, Oxford University Clinical Research Unit  
Dr Le Thi Quynh Mai, National Institute of Hygiene and Epidemiology

#### **WHO Collaborating Centres for Reference and Research on Influenza**

Dr Nancy Cox, Centers for Disease Control and Prevention, USA  
Dr Alan Hay, National Institute for Medical Research, UK  
Dr Masato Tashiro, National Institute of Infectious Disease, Japan

#### **WHO Secretariat**

##### **Global Influenza Programme**

Dr Keiji Fukuda  
Dr Frederick G. Hayden (Secretariat for Consultation)  
Dr Nahoko Shindo (Secretariat for Consultation)

##### **Communicable Diseases**

Mr Gregory Härtl

##### **Regional Offices**

Dr Yokouide Allaranga (AFRO)  
Dr Monica Guardo Martinez (AMRO/PAHO)  
Dr Hassan El Mahdi El Bushra (EMRO)  
Dr Caroline Brown (EURO)  
Dr Andreas Gilsdorf (EURO)  
Dr Khanchit Limpakarnjanarat (SEARO)  
Dr Zhou Weigong (WPRO)

##### **WHO Country Offices**

Mr Samir Mehdiyev (Azerbaijan)  
Dr Nima Asgari (China)  
Dr Graham Tallis (Indonesia)  
Dr Buthaina Ghanem k. Abu Alia (Iraq)  
Dr Olumuyiwa Odusanya (Nigeria)  
Dr Somchai Peerapakorn (Thailand)  
Mr Y. Mehmet Kontas (Turkey)  
Dr Richard Brown (Vietnam)

## Reference List

- (1) WHO. Cumulative number of confirmed human cases of avian influenza A/(H5N1) reported to WHO.  
[http://www.who.int/csr/disease/avian\\_influenza/country/cases\\_table\\_2007\\_10\\_17/en/index.html](http://www.who.int/csr/disease/avian_influenza/country/cases_table_2007_10_17/en/index.html). 2007.
- (2) Vong S, Coghlan B, Mardy S et al. Low frequency of poultry-to-human H5N1 virus transmission, Southern Cambodia, 2005. *Emerging Infectious Diseases* 2006; 12(10):1542-1547.
- (3) Buchy P, Mardy S, Vong S et al. Influenza A/H5N1 virus infection in humans in Cambodia. *Journal of Clinical Virology* 2007; 39(3):164-168.
- (4) Yu H, Shu Y, Hu S et al. The first confirmed human case of avian influenza A (H5N1) in Mainland China. *The Lancet* 2006; 367(9504):84.
- (5) Apisarnthanarak A, Erb S, Stephenson I et al. Seroprevalence of anti-H5 antibody among Thai health care workers after exposure to avian influenza (H5N1) in a tertiary care center. *Clin Infect Dis* 2005; 40(2):e16-e18.
- (6) Wang M, Di B, Zhou D-H et al. Food markets with live birds as source of avian influenza. *Emerging Infectious Diseases* 2006; 12(11):1773-1775.
- (7) Apisarnthanarak A, Puthavathana P, Kitphati R et al. Avian influenza H5N1 screening of intensive care unit patients with community-acquired pneumonia. *Emerging Infectious Diseases* 2006; 12(11):1766-1769.
- (8) Ortiz J, Katz M, Mahmoud M et al. Lack of Evidence of Avian-to-Human Transmission of Avian Influenza A (H5N1) Virus among Poultry Workers, Kano, Nigeria, 2006. *The Journal of Infectious Diseases* 2007; 196(11):1685-1691.
- (9) Ortiz JR, Wallis TR, Katz MA et al. No Evidence of Avian Influenza A (H5N1) among Returning US Travelers. *Emerging Infectious Diseases* 2007; 13(2):294-297.
- (10) Yuen KY, Chan PK, Peiris M et al. Clinical features and rapid viral diagnosis of human disease associated with avian influenza A H5N1 virus. *Lancet* 1998; 351(9101):467-471.
- (11) Oner AF, Bay A, Arslan S et al. Avian Influenza A (H5N1) Infection in Eastern Turkey in 2006. *The New England Journal of Medicine* 2006; 355(21):2179-2185.

- (12) Kandun IN, Wibisono H, Sedyaningsih ER et al. Three Indonesian Clusters of H5N1 Virus Infection in 2005. *The New England Journal of Medicine* 2006; 355(21):2186-2194.
- (13) Mishin VP, Hayden FG, Gubareva LV. Susceptibilities of Antiviral-Resistant Influenza Viruses to Novel Neuraminidase Inhibitors. *Antimicrob Agents Chemother* 2005; 49(11):4515-4520.
- (14) Arnold E. Intramuscular peramivir injections promote survival in H5N1 ferret model. 46th ICAAC Late Breaker Abstract Program , 5 (Poster # V-2041b). 2006.
- (15) Boltz DA, Ilyushina NA, Arnold CS, Babu YS, Webster RG, Govorkova EA. Intramuscular Administration of Neuraminidase Inhibitor Peramivir Promotes Survival Against Lethal H5N1 Influenza Infection in Mice. *Antiviral Research* 2007; 74(3):A32.
- (16) Stittelaar K, Simon J, Pistor F, Tisdale M, Osterhaus A. Evaluation of intravenous (IV) zanamivir against H5N1 infection in the cynomolgus macaque. Poster Presentations: Antivirals Resistance, Options IV, 2007 , 229 (Abst P911). 2007.
- (17) Calfee DP, Peng AW, Cass L, Lobo M, Hayden FG. Safety and efficacy of intravenous zanamivir in preventing experimental human influenza A virus infection. *Antimicrob Agents Chemother* 1999; 43(7):1616-1620.
- (18) Sidwell RW, Barnard DL, Day CW et al. Efficacy of Orally Administered T-705 on Lethal Avian Influenza A (H5N1) Virus Infections in Mice. *Antimicrob Agents Chemother* 2007; 51(3):845-851.
- (19) Malakhov MP, Aschenbrenner LM, Smee DF et al. Sialidase fusion protein as a novel broad-spectrum inhibitor of influenza virus infection. *Antimicrobial Agents & Chemotherapy* 2006; 50(4):1470-1479.
- (20) Belser JA, Lu X, Szretter K et al. DAS181, A novel sialidase fusion protein, protects mice from lethal avian influenza H5N1 virus infection. *Journal of Infect Diseases* 2007; 196(10):1493-1499.
- (21) Hanson B, Boon A, Lim A, Webb A, Ooi E, Webby R. Passive immunoprophylaxis and therapy with humanized monoclonal antibody specific for influenza A H5 hemagglutinin in mice. *Respiratory Research* 2006; 7(1):126.
- (22) Lu J, Guo Z, Pan X et al. Passive immunotherapy for influenza A H5N1 virus infection with equine hyperimmune globulin F(ab')<sub>2</sub> in mice. *Respiratory Research* 2006; 7:43.
- (23) Kong LK. Successful treatment of avian influenza with convalescent plasma. *Hong Kong Medical Journal* 2006; 12(6):489.

- (24) Zhou B, Zhong N, Guan Y. Treatment with Convalescent Plasma for Influenza A (H5N1) Infection. *The New England Journal of Medicine* 2007; 357(14):1450-1451.
- (25) Ilyushina NA, Webster R, Govorkova EA. Oseltamivir-Ribavirin combination therapy for highly pathogenic H5N1 influenza virus infection in mice. *Program and Abstracts / Antiviral Research* 74, A31 (Abstr 12). 2007.
- (26) Treanor JJ, Wilkinson BE, Maseoud F et al. Safety and immunogenicity of a recombinant hemagglutinin vaccine for H5 influenza in humans. *Vaccine* 2001; 19(13-14):1732-1737.
- (27) Nicholson KG, Colegate AE, Podda A et al. Safety and antigenicity of non-adjuvanted and MF59-adjuvanted influenza A/Duck/Singapore/97 (H5N3) vaccine: a randomised trial of two potential vaccines against H5N1 influenza. *The Lancet* 2001; 357(9272):1937-1943.
- (28) Stephenson I, Bugarini R, Nicholson KG et al. Cross-reactivity to highly pathogenic avian influenza H5N1 viruses after vaccination with nonadjuvanted and MF59-adjuvanted influenza A/Duck/Singapore/97 (H5N3) vaccine: a potential priming strategy. *J Infect Dis* 2005; 191(8):1210-1215.
- (29) Treanor JJ, Campbell JD, Zangwill KM, Rowe T, Wolff M. Safety and immunogenicity of an inactivated subvirion influenza A (H5N1) vaccine. *New England Journal of Medicine* 2006; 354(13):1343-1351.
- (30) Leroux-Roels I, Borkowski A, Vanwolleghem T et al. Antigen sparing and cross-reactive immunity with an adjuvanted rH5N1 prototype pandemic influenza vaccine: a randomised controlled trial. *The Lancet* 2007; 370(9587):580-589.
- (31) Bresson JL, Perronne C, Launay O et al. Safety and immunogenicity of an inactivated split-virion influenza A/Vietnam/1194/2004 (H5N1) vaccine: phase I randomised trial. *The Lancet* 2006; 367(9523):1657-1664.
- (32) Lin J, Zhang J, Dong X et al. Safety and immunogenicity of an inactivated adjuvanted whole-virion influenza A (H5N1) vaccine: a phase I randomised controlled trial. *The Lancet* 2006; 368(9540):991-997.
- (33) Smith GJD, Naipospos TSP, Nguyen TD et al. Evolution and adaptation of H5N1 influenza virus in avian and human hosts in Indonesia and Vietnam. *Virology* 2006; 350(2):258-268.
- (34) Obenauer JC, Denson J, Mehta PK et al. Large-Scale Sequence Analysis of Avian Influenza Isolates. *Science* 2006; 311(5767):1576-1580.

- (35) Ducatez MF, Olinger CM, Owoade AA et al. Molecular and antigenic evolution and geographical spread of H5N1 highly pathogenic avian influenza viruses in western Africa. *J Gen Virol* 2007; 88(8):2297-2306.
- (36) Salzberg SL, Kingsford C, Cattoli G et al. Genome analysis linking recent European and African influenza (H5N1) viruses. *Emerging Infectious Diseases* 2007; 13(5):713-718.
- (37) WHO. Evolution of H5N1 avian influenza viruses in Asia. *Emerging Infectious Diseases* 2005; 11(10):1515-1521.
- (38) WHO. Towards a unified nomenclature system for the highly pathogenic H5N1 avian influenza viruses.  
[http://www.who.int/csr/disease/avian\\_influenza/guidelines/nomenclature/en/index.html](http://www.who.int/csr/disease/avian_influenza/guidelines/nomenclature/en/index.html). 2007.
- (39) Saad MD, Ahmed LS, Gamal-Eldein MA, Fouda MK, Khalil FM, Yingst SL. Possible avian influenza (H5N1) from migratory bird, Egypt. *Emerging Infectious Diseases* 2007; 13(7):1120-1121.
- (40) Kung NY, Morris RS, Perkins NR et al. Risk for infection with highly pathogenic influenza A virus (H5N1) in chickens, Hong Kong, 2002. *Emerging Infectious Diseases* 2007; 13(3):412-418.
- (41) Smallman-Raynor M, Cliff AD. Avian influenza A (H5N1) age distribution in humans. *Emerging Infectious Diseases* 2007; 13(3):510-512.
- (42) Shu Y, Yu H, Li D. Lethal Avian Influenza A (H5N1) Infection in a Pregnant Woman in Anhui Province, China. *The New England Journal of Medicine* 2006; 354(13):1421-1422.
- (43) Health Protection Agency. WHO pandemic alert phase 3: Algorithm for the management of returning travellers and visitors from countries affected by avian influenza (H5N1) presenting with febrile respiratory illness: recognition, investigation and initial management. Health Protection Agency Web Site 16 May 2007. 2007.  
[http://www.hpa.org.uk/infections/topics\\_az/influenza/avian/algorithm.htm#](http://www.hpa.org.uk/infections/topics_az/influenza/avian/algorithm.htm#)
- (44) Liem NT, World Health Organization International Avian Influenza Investigation Team V, Lim W. Lack of H5N1 avian influenza transmission to hospital employees, Hanoi, 2004. *Emerging Infectious Diseases* 2005; 11(2):210-215.
- (45) Schultz C, Dong VC, Chau NVV et al. Avian influenza H5N1 and healthcare workers. *Emerging Infectious Diseases* 2005; 11(7):1158-1159.

- (46) Gilsdorf A, Boxall N, Gasimov V et al. Two clusters of human infection with influenza A/H5N1 virus in the Republic of Azerbaijan, February-March 2006. *Eurosurveillance* 2006; 11(4-6):122-126.
- (47) Areechokchai D, Jiraphongsa C, Laosiritaworn Y, Hanshaoworakul W, O'Reilly M. Investigation of avian influenza (H5N1) outbreak in humans ---Thailand, 2004. *MMWR - Morbidity & Mortality Weekly Report* 2006; 55(Suppl 01):3-6.
- (48) ECDC. Avian influenza A/H5N1 in bathing and potable (drinking) water and risks to human health. Version June 2006, 2-12. 2006.  
[http://www.ecdc.eu.int/Health\\_topics/Avian\\_Influenza/pdf/H5N1\\_Bathing\\_water\\_060609.pdf](http://www.ecdc.eu.int/Health_topics/Avian_Influenza/pdf/H5N1_Bathing_water_060609.pdf)
- (49) Yingst SL, Saad MD, Felt SA. Qinghai-like H5N1 from domestic cats, Northern Iraq. *Emerging Infectious Diseases* 2006; 12(8):1295-1297.
- (50) Rimmelzwaan GF, van Riel D, Baars M et al. Influenza A Virus (H5N1) Infection in Cats Causes Systemic Disease with Potential Novel Routes of Virus Spread within and between Hosts. *Am J Pathol* 2006; 168(1):176-183.
- (51) Songserm T, Amonsin A, Jam-on R et al. Avian influenza H5N1 in naturally infected domestic cat. *Emerging Infectious Diseases* 2007; 12(4):681-683.
- (52) Kuiken T, Rimmelzwaan G, van Riel D et al. Avian H5N1 Influenza in Cats. *Science* 2004; 306(5694):241.
- (53) Maas R, Tacken M, Ruuls L, Koch G, van Rooij E, Stockhofe-Zurwieden N. Avian influenza (H5N1) susceptibility and receptors in dogs. *Emerging Infectious Diseases* 2007; 13(8):1219-1220.
- (54) Robertson SI, Bell DJ, Smith GJD et al. Avian influenza H5N1 in viverrids: implications for wildlife health and conservation. *Proceedings of the Royal Society B: Biological Sciences* 2006; 273(1595):1729-1732.
- (55) Choi YK, Nguyen TD, Ozaki H et al. Studies of H5N1 Influenza Virus Infection of Pigs by Using Viruses Isolated in Vietnam and Thailand in 2004. *J Virol* 2005; 79(16):10821-10825.
- (56) Li H, Yu K, Yang H et al. Isolation and characterization of H5N1 and H9N2 influenza viruses from pigs in China. *Chinese Journal of Preventive Veterinary Medicine* 2004; 26(1):1-6.
- (57) Keawcharoen J, Oraveerakul K, Kuiken T et al. Avian influenza H5N1 in tigers and leopards. *Emerging Infectious Diseases* 2004; 10(12):2189-2191.
- (58) WHO. Avian influenza -- H5N1 infection found in a stone marten in Germany. WHO. 2006. [http://www.who.int/csr/don/2006\\_03\\_09a/en/print.html](http://www.who.int/csr/don/2006_03_09a/en/print.html)

- (59) Scientific Report of the Scientific Panel on Biological Hazards on: Food as a possible source of infection with highly pathogenic avian influenza viruses for humans and other mammals. *EFSA Journal* 2006; 74:1-29.
- (60) Guan Y, Poon LLM, Cheung CY et al. H5N1 influenza: A protean pandemic threat. *PNAS* 2004; 101(21):8156-8161.
- (61) Chen H, Smith GJD, Zhang SY et al. Avian flu H5N1 virus outbreak in migratory waterfowl. *Nature* 2005; 436:191-192.
- (62) Shinya K, Hatta M, Yamada S et al. Characterization of a Human H5N1 Influenza A Virus Isolated in 2003. *J Virol* 2005; 79(15):9926-9932.
- (63) Auewarakul P, Suptawiwat O, Kongchanagul A et al. An avian influenza H5N1 virus that binds to human-type receptor. *J Virol* 2007; 81(18):9950-9955.
- (64) Subbarao EK, London W, Murphy BR. A single amino acid in the PB2 gene of influenza A virus is a determinant of host range. *Journal of Virology* 1993; 67(4):1761-1764.
- (65) Massin P, van der Werf S, Naffakh N. Residue 627 of PB2 Is a Determinant of Cold Sensitivity in RNA Replication of Avian Influenza Viruses. *J Virol* 2001; 75(11):5398-5404.
- (66) Li Z, Chen H, Jiao P et al. Molecular Basis of Replication of Duck H5N1 Influenza Viruses in a Mammalian Mouse Model. *J Virol* 2005; 79(18):12058-12064.
- (67) Horimoto T, Kawaoka Y. Influenza: Lessons from past pandemics, warnings from current incidents. *Nat Rev Micro* 2005; 3(8):591-600.
- (68) Uiprasertkul M, Puthavathana P, Sangsiriwut K et al. Influenza A H5N1 replication sites in humans. *Emerging Infectious Diseases* 2005; 11(7):1036-1041.
- (69) Chutinimitkul S, Bhattarakosol P, Srisuratanon S et al. H5N1 influenza A virus and infected human plasma. *Emerging Infectious Diseases* 2006; 12(6):1041-1043.
- (70) Ng WF, To KF. Pathology of human H5N1 infection: new findings. *The Lancet* 2007; 370(9593):1106-1108.
- (71) To KF, Chan PKS, Chan K-F et al. Pathology of fatal human infection associated with avian influenza A H5N1 virus. *Journal of Medical Virology* 2001; 63:242-246.
- (72) Peiris JS, Yu WC, Leung CW et al. Re-emergence of fatal human influenza A subtype H5N1 disease. *Lancet* 2004; 363:617-619.

- (73) Cheung CY, Poon LL, Lau AS et al. Induction of proinflammatory cytokines in human macrophages by influenza A (H5N1) viruses: a mechanism for the unusual severity of human disease? *Lancet* 2002; 360(9348):1831-1837.
- (74) Hien TT, Liem NT, Dung NT et al. Avian influenza A (H5N1) in 10 patients in Vietnam. *New England Journal of Medicine* 2004; 350(12):1179-1188.
- (75) Apisarnthanarak A, Kitphati R, Thongphubeth K et al. Atypical avian influenza (H5N1). *Emerging Infectious Diseases* 2004; 10(7):1321-1324.
- (76) Zhang W, Wen LY, Lu M et al. Clinical characteristic analysis of the first human case infected by influenza A (H5N1) in Jiangxi Province. *Chinese journal of tuberculosis and respiratory diseases* 2006; 29(5):300-306.
- (77) Zhu QY, Qin E-D, Wang W et al. Fatal Infection with Influenza A (H5N1) Virus in China. *The New England Journal of Medicine* 2006; 354(25):2731-2732.
- (78) Chotpitayasunondh T, Ungchusak K, Hanshaoworakul W et al. Human disease from influenza A (H5N1), Thailand, 2004. *Emerging Infectious Diseases* 2005; 11(2):201-209.
- (79) WHO. WHO case definitions for human infections with influenza A(H5N1) virus.  
[http://www.who.int/csr/disease/avian\\_influenza/guidelines/case\\_definition2006\\_08\\_29/en/index.html](http://www.who.int/csr/disease/avian_influenza/guidelines/case_definition2006_08_29/en/index.html). 2006.
- (80) Temperton NJ, Hoschler K, Major D et al. A sensitive retroviral pseudotype assay for influenza H5N1-neutralizing antibodies. *Influenza and Other Respiratory Viruses* 2007; 1(3):105-112.
- (81) Stephenson I, Wood JM, Nicholson KG, Charlett A, Zambon MC. Detection of anti-H5 responses in human sera by HI using horse erythrocytes following MF59-adjuvanted influenza A/Duck/Singapore/97 vaccine. *Virus Research* 2004; 103(1-2):91-95.
- (82) Fedorko DP, Nelson NA, McAuliffe JM, Subbarao K. Performance of Rapid Tests for Detection of Avian Influenza A Virus Types H5N1 and H9N2. *J Clin Microbiol* 2006; 44(4):1596-1597.
- (83) Rameix-Welti MA, Agou F, Buchy P et al. Natural Variation Can Significantly Alter the Sensitivity of Influenza A (H5N1) Viruses to Oseltamivir. *Antimicrob Agents Chemother* 2006; 50(11):3809-3815.
- (84) Treanor JJ, Hayden FG, Vrooman PS et al. Efficacy and safety of the oral neuraminidase inhibitor oseltamivir in treating acute influenza. *JAMA* 2000; 283(8):1016-1024.

- (85) Nicholson KG, Aoki FY, Osterhaus AD et al. Efficacy and safety of oseltamivir in treatment of acute influenza; a randomized controlled trial. *Lancet* 2000; 335:1845-1850.
- (86) Medeiros R, Rameix-Welti MA, Lorin V et al. Failure of zanamivir therapy for pneumonia in a bone-marrow transplant recipient infected by a zanamivir-sensitive influenza A (H1N1) virus. *Antiviral Therapy* 2007; 12(4):571-576.
- (87) Dellinger RPM, Carlet JMM, Masur HM et al. Surviving Sepsis Campaign guidelines for management of severe sepsis and septic shock. [Article]. *Critical Care Medicine* 2004; 32(3):858-873.
- (88) Ferguson NM, Cummings DAT, Cauchemez S et al. Strategies for containing an emerging influenza pandemic in Southeast Asia. *Nature* 2005; 437(7056):209-214.
- (89) Longini IM, Jr., Nizam A, Xu S et al. Containing Pandemic Influenza at the Source. *Science* 2005; 309(5737):1083-1087.
- (90) WHO. Avian influenza, including influenza A (H5N1), in humans: WHO interim infection control guideline for health care facilities. World Health Organization. 2007.  
[http://www.who.int/csr/resources/publications/AI\\_Inf\\_Control\\_Guide\\_10May2007.pdf](http://www.who.int/csr/resources/publications/AI_Inf_Control_Guide_10May2007.pdf)
- (91) CDC. Interim recommendations for infection control in health-care facilities caring for patients with known or suspected avian influenza. Centers For Disease Control and Prevention. 2007.  
<http://www.cdc.gov/flu/avian/professional/pdf/infectcontrol.pdf>
- (92) WHO. Advice for people living in areas affected by bird flu or avian influenza. World Health Organization. 2004.  
<http://www.wpro.who.int/NR/ronlyres/04FA6993-8CD1-4B72-ACB9-EB0EBD3D0CB1/0/Advice10022004rev08112004.pdf>
- (93) CDC. Interim guidance for protection of persons involved in U.S. avian influenza outbreak disease control and eradication activities. Centers For Disease Control and Prevention. 2006.  
<http://www.cdc.gov/flu/avian/professional/pdf/protectionguid.pdf>
- (94) U.S.Department of Labor. Avian influenza protecting poultry workers at risk. [www.osha.gov](http://www.osha.gov). 2004. <http://www.osha.gov/dts/shib/shib121304.html>
- (95) CDC. Updated interim guidance for laboratory testing of persons with suspected infection with avian influenza A (H5N1) virus in the United States. Centers For Disease Control and Prevention. 2006.  
<http://www2a.cdc.gov/han/ArchiveSys/ViewMsgV.asp?AlertNum=00246>

- (96) Centers for Disease Control. Interim recommendations for persons with possible exposure to avian influenza during outbreaks among poultry in the United States. Centers For Disease Control and Prevention. 2004.  
<http://www.cdc.gov/flu/avian/professional/pdf/possible-exposure-avianflu.pdf>
- (97) Kieny MP, Costa A, Hombach J et al. A global pandemic influenza vaccine action plan. *Vaccine* 2006; 24(40-41):6367-6370.
- (98) Stephenson I, Gust I, Pervikov Y, Kieny MP. Development of vaccines against influenza H5. *The Lancet Infectious Diseases* 2006; 6(8):458-460.
- (99) Lu X, Edwards LE, Desheva JA et al. Cross-protective immunity in mice induced by live-attenuated or inactivated vaccines against highly pathogenic influenza A (H5N1) viruses. *Vaccine* 2006; 24(44-46):6588-6593.
